# Supplementary material
Source: publisher figshare collection journal article supplement (https://gsapubs.figshare.com/ndownloader/files/22758677)
Supplement: Supplementary file 1 [file 22758677]

**Analytical techniques**

The structural characterization of graphite from the Borrowdale deposit has been carried out by means of X-ray diffraction (XRD) and Raman spectroscopy. For the XRD study, after grinding and homogenization to  $<53\ \mu\text{m}$ , ten samples of randomly orientated powders of graphite were run in a Siemens D-500 diffractometer, using  $\text{Cu-K}\alpha$  radiation at 30 kV and 40 mA, a step size of  $0.03\ (^{\circ}2\theta)$ , a slit system of  $1^{\circ}$ - $1^{\circ}$ - $1^{\circ}$ - $0.15^{\circ}$ , and time per step of 1 s (scan rate of  $1.8^{\circ}\ 2\theta/\text{min}$ ). Each sample was run at least twice using silicon as the internal standard. Measurements on the XRD patterns were done using the Diffrac Plus EVA 10.0 software.

Raman spectra were collected with the Renishaw INVIA equipment at the Ecole Normale Supérieure (Paris, France) on polished thin sections used for the petrographic study. A total of 60 measurements were obtained focusing the laser beam on graphite located beneath the surface of adjacent transparent minerals (usually quartz, chlorite, and epidote) to avoid the effect of polishing at the surface of the thin section which may alter the graphite structure (Pasteris, 1989; Beyssac et al., 2003). The 514.5 nm wavelength of a 20 mW Spectra Physics Argon laser focused through a 100x objective (N.A.=0.90) was used for the analyses. Under these conditions the spatial resolution is  $\sim 1\ \mu\text{m}$  and the spectral resolution is close to  $1\ \text{cm}^{-1}$ . Laser power on the sample surface was reduced to 2 mW to avoid radiation damage to the graphite. Raman analysis of graphite also might be affected by polarization effects between the incident laser electromagnetic field and the structure of graphite, and this might virtually enhance the defect bands especially for measurement on the graphite edge planes. These effects are rather weak with a 514.5 nm wavelength (Tan et al., 2004), and to further attenuate them we used a  $\frac{1}{4}$  wavelength plate before the microscope which yields a circular polarization of the laser. The Raman parameters (peak position, band intensity, and band area) were determined with the computer program PeakFit 3.0 using a Voigt function.

The microthermometric study of the fluid inclusions was carried out using a Linkam THMSG 600 heating and freezing stage at the Department of Crystallography and Mineralogy, Universidad Complutense, Madrid. Raman analysis of the volatile fraction was also performed at the Ecole Normale Supérieure under the same analytical conditions given above, but the laser power in this case was 50 mW. Bulk composition,

density and molar volume of the inclusions were calculated with the computer programs DENSITY, ICE and BULK, versions 12/02 (Bakker and Brown, 2003) using the Duan et al. (1992a,b) equation of state and considering NaCl as the only salt in solution.

### **Fluid inclusions data**

Fluid inclusions were studied in quartz fragments hosted by the graphite nodule-bearing pipes (Figure DR1). The angular shape of these fragments and their internal grainy texture indicate that the quartz was brecciated, pulled up from its original location and transported upwards within subvertical structures favoured by a fluid-rich regime that eventually resulted in the precipitation of huge amounts of graphite. These fluids were recorded as secondary fluid inclusions in the quartz xenoliths. Three types of secondary fluid inclusions have been recognized, based upon appearance at room temperature and microthermometric behaviour:

Type V. Two-phase vapour-rich inclusions ( $V_v/V_t = 60-90\%$ ), made up by  $H_2O$ - $CO_2$ - $CH_4$ . These inclusions are very abundant and occur along trails within the clear cores of the quartz grains. Raman data of the volatile fraction indicate mixtures of  $CO_2$ - $CH_4$ , with  $X_{CO_2}$  between 0.6-0.75. The average bulk composition (mol fraction) of these inclusions is 0.65  $H_2O$ , 0.24  $CO_2$ , 0.11  $CH_4$  and 1.4 wt% NaCl, with a  $X_{CO_2}/(X_{CO_2}+X_{CH_4})$  ratio of 0.69 and an average molar volume of  $40 \text{ cm}^3 \cdot \text{mol}^{-1}$ . Total homogenization of the inclusions ranges 295-340 °C (into vapour) and 328-350 °C (critical behaviour) indicating that the fluid would be a vapour-like supercritical phase at the trapping conditions. Complete microthermometric and compositional data of selected type V inclusions can be found in Table DR1.

Type L1. Two-phase liquid-rich  $H_2O$ - $CO_2$ - $CH_4$ -bearing inclusions ( $V_v/V_t = 25-40\%$ ). These inclusions are very scarce and occur spatially associated with type V inclusions. Raman analysis indicates  $X_{CO_2}$  between 0.03-0.28 in most L1 inclusions ( $n=6$ ) and only two specimens with  $X_{CO_2}=0.6-0.62$ . Bulk composition (mol fraction), calculated only in one inclusion due to the difficulty of measuring clathrate melting, is estimated to be 0.916  $H_2O$ , 0.018  $CO_2$ , 0.022  $CH_4$  and 0.044 NaCl (7.2 wt% NaCl), with a  $X_{CO_2}/(X_{CO_2}+X_{CH_4})$  ratio of 0.45 and a molar volume of  $25 \text{ cm}^3 \cdot \text{mol}^{-1}$ . Total homogenization occurs between 279 and 378 °C, in a range which is similar to homogenization temperatures for type V inclusions. However, whereas type V homogenizes either by bubble expansion or show critical behaviour, L1 inclusions always homogenize into liquid.

Type L2. Two-phase liquid-rich inclusions ( $V_v/V_t < 10\%$ ). They are very abundant and occur along trails that occasionally cross-cut quartz grain boundaries, thus indicating that the inclusions are secondary in origin and postdate the type V and L1 fluid circulation. They also occur in recrystallized boundaries of the quartz grains, probably as primary inclusions.  $\text{CH}_4$  is the only carbonic species in these inclusions, with an estimated average composition of 0.93  $\text{H}_2\text{O}$ , 0.02  $\text{CH}_4$  and 0.05  $\text{NaCl}$ . Melting of ice occurs in the range  $-6$  to  $-2.8$   $^{\circ}\text{C}$  and indicates salinities between 4.5 and 9.5 wt%  $\text{NaCl}$ . The total homogenization of the L2 inclusions occurs between 123 and 204  $^{\circ}\text{C}$ , with a maximum in the interval 180-190  $^{\circ}\text{C}$ .

These fluid inclusions assemblages have been interpreted to be the record of the evolution of the carbon-bearing fluids involved in the pipes' development and the subsequent graphite deposition. In this scenario, the type V vapour-rich fluid would be the fluid circulating at the earliest stages of the process just before graphite saturation was reached. Therefore, the physicochemical parameters estimated from this fluid would indicate the initial P-T- $f\text{O}_2$  conditions of the graphite forming system which are the aim of this paper.

### References cited

- Bakker, R.J., and Brown, P.E., 2003, Computer Modelling in Fluid Inclusion Research, in Samson, I., Anderson, A., and Marshall, D., eds., Fluid Inclusions: Analysis and Interpretation. Mineralogical Association of Canada, Short Course series, v. 32, p. 175–212.
- Beyssac, O., Goffé, B., Petitet, J.P., Froigneux, E., Moreau, M., and Rouzaud, J.-N., 2003, On the characterization of disordered and heterogeneous carbonaceous materials by Raman spectroscopy. *Spectrochimica Acta, Part A*, v. 59, p. 2267-2276.
- Duan, Z., Møller, N., and Weare, J.H., 1992a, An equation of state for the  $\text{CH}_4\text{-CO}_2\text{-H}_2\text{O}$  system: I. Pure systems from 0 to 1000  $^{\circ}\text{C}$  and 0 to 8000 bar: *Geochimica et Cosmochimica Acta*, v. 56, p. 2605–2617, doi: 10.1016/0016-7037(92)90347-L.
- Duan, Z., Møller, N., and Weare, J.H., 1992b, An equation of state for the  $\text{CH}_4\text{-CO}_2\text{-H}_2\text{O}$  system: II. Mixtures from 50 to 1000  $^{\circ}\text{C}$  and 0 to 1000 bar: *Geochimica et Cosmochimica Acta*, v. 56, p. 2619–2631, doi: 10.1016/0016-7037(92)90348-M.

- Pasteris, J.D., 1989, In situ analysis in geological thin-sections by Laser Raman Microprobe Spectroscopy: a cautionary note. *Applied Spectroscopy*, v. 43, p. 567-570.
- Tan, P.H., Dimovski, S., and Gogotsi Y., 2004, Raman scattering of non-planar graphite: arched edges, polyhedral crystals, whiskers and cones. *Philosophical Transactions of the Royal Society of London, part A*, v. 362, p. 2289-2310, doi: 10.1098/rsta.2004.1442.

TABLE DR1. MICROTHERMOMETRIC, RAMAN AND CALCULATED COMPOSITIONAL DATA OF SELECTED TYPE V INCLUSIONS FROM THE BORROWDALE DEPOSIT

| Vv/Vt | Non aqueous phase data |                   |       |                  |                  |              | Bulk inclusion data |                  |                  |          |       |                   |                   |
|-------|------------------------|-------------------|-------|------------------|------------------|--------------|---------------------|------------------|------------------|----------|-------|-------------------|-------------------|
|       | TmCO <sub>2</sub>      | ThCO <sub>2</sub> | TmCl  | XCO <sub>2</sub> | XCH <sub>4</sub> | Molar volume | XH <sub>2</sub> O   | XCO <sub>2</sub> | XCH <sub>4</sub> | Salinity | TH    | Bulk molar volume | #XCO <sub>2</sub> |
| 0.8   | -58.4                  | +1.5 L            | +14.2 | 0.64             | 0.36             | 75.43        | 0.49                | 0.33             | 0.18             | 3.03     | 294 * | 46.50             | 0.65              |
| 0.5   | -57.4                  | +8.9 L            | +14.2 | 0.75             | 0.25             | 75.52        | 0.78                | 0.17             | 0.05             | 0.47     | 340 C | 29.66             | 0.43              |
| 0.7   | -                      | +3.8 L            | +14.2 | 0.75             | 0.25             | 77.29        | 0.63                | 0.28             | 0.09             | 0.28     | 300 * | 39.50             | 0.76              |
| 0.7   | -                      | -8.1 L            | +14.2 | 0.60             | 0.40             | 86.52        | 0.64                | 0.21             | 0.13             | 2.86     | 295 * | 40.90             | 0.62              |
| 0.7   | -58.7                  | -1.9 L            | +14.4 | 0.67             | 0.33             | 81.78        | 0.64                | 0.25             | 0.11             | 1.36     | 293 * | 40.21             | 0.69              |
| 0.7   | -                      | +3.3 L            | +14.2 | 0.75             | 0.25             | 76.16        | 0.62                | 0.29             | 0.09             | 0.4      | 318 V | 39.30             | 0.76              |
| 0.6   | -61.8                  | +5.1 L            | +14.2 | 0.69             | 0.31             | 74.99        | 0.71                | 0.20             | 0.08             | 2.02     | 340 V | 33.62             | 0.71              |
| 0.9   | -                      | +4.1 L            | +14.2 | 0.68             | 0.32             | 75.83        | 0.0024              | 0.768            | 0.23             | -        | 322 V | 84.26             | 0.77              |

Molar volume in cm<sup>3</sup>.mol<sup>-1</sup>, salinity in eq. NaCl wt%, temperature in °C. Vv/Vt: bubble volume fraction, X: molar fraction, Tm: melting temperature, Th: partial homogenization temperature, TH: total homogenization temperature, Cl: clathrate, #XCO<sub>2</sub>= XCO<sub>2</sub>/(XCO<sub>2</sub>+XCH<sub>4</sub>), \* Decrepitation temperature before homogenization, C: critical homogenization, L: homogenization into liquid, V: homogenization into vapour.

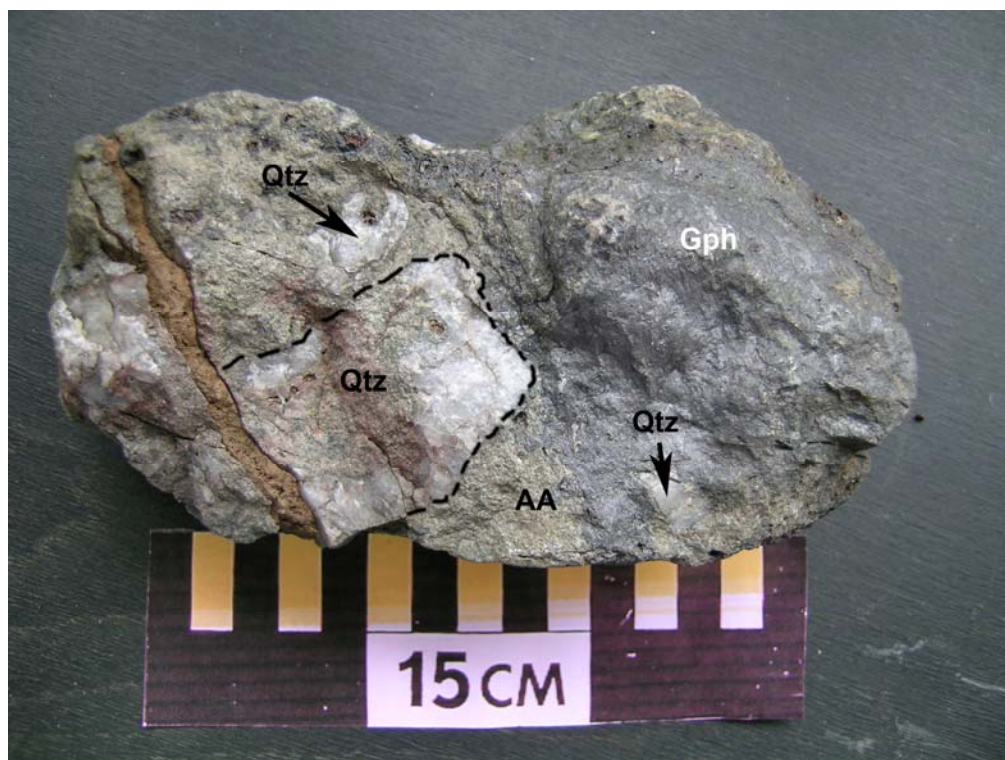

Figure DR1. Hand specimen of the common graphite-quartz association from the Borrowdale deposit. Note the large angular quartz fragment (Qtz), and the intense alteration of the andesite host rock (AA). Small quartz fragments are also embedded within the graphite mass (Gph).

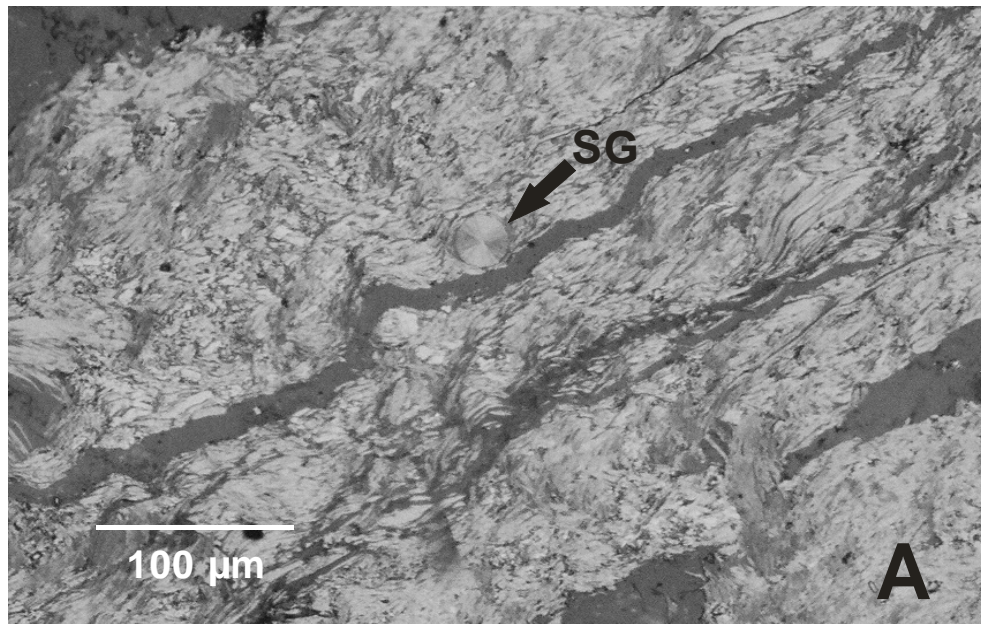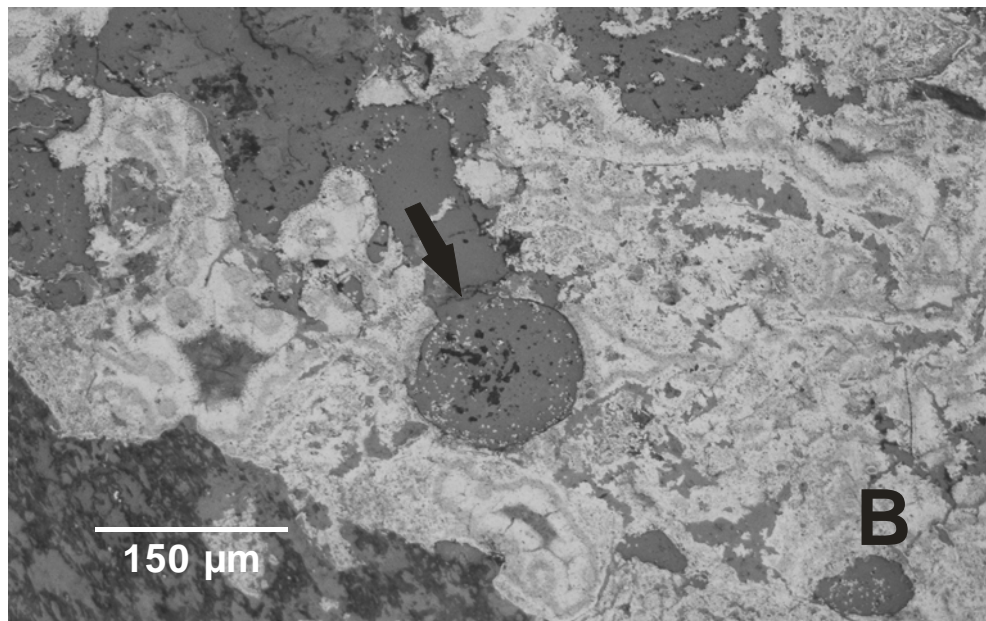

Figure DR2: Reflected light photomicrographs (one polar) of graphite morphologies from the Borrowdale deposit. A) Spherulitic graphite (SG) within flaky graphite. B) Cryptocrystalline graphite with colloform texture enclosing quartz grains. The arrow indicates a rounded quartz grain containing minute spherulites of graphite.

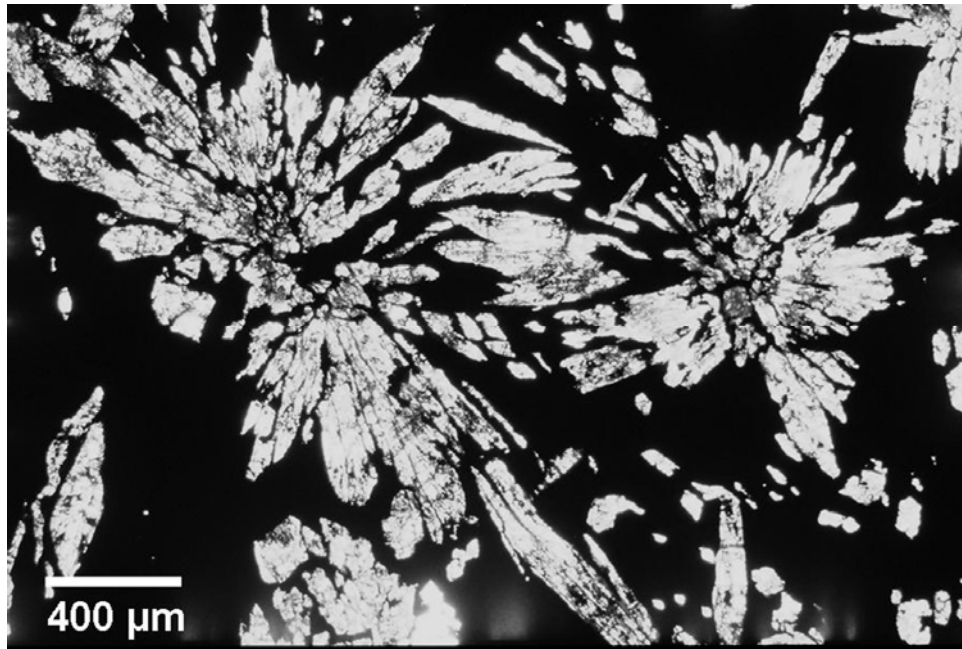

Figure DR3: Transmitted light photomicrograph showing radial aggregates of epidote crystals within a graphite (in black) nodule.
